# Supplementary material for: Sulfur Poisoning on Rh Nanoparticles but Sulfur Promotion on Its Single-Site Catalyst for Carbonylation
Source: Research Square preprint supplement (doi:10.21203/rs.3.rs-401859/v1), 2021-07-13
Supplement: Supplementary file 1 [file 241394f2064c302cf823ca9b.docx]

**Extended Data**

**Sulfur Poisoning on Rh Nanoparticles but Sulfur Promotion on its Single-Site Catalyst for Carbonylation**

Siquan Feng1#, Jiali Mu1#, Xiangsong Lin2#, Xiangen Song1*, Olga Safonova3, Nachtegaal Maarten3, Siyue Liu4, Qiao Yuan1,5, Xingju Li1,6, Weiqing Zhang4, Guorong Wu4, Jiayue, Yang4, Wenrui Dong4*, Xueming Yang4,7, Jingwei Li1, Zheng Jiang8, Yunjie Ding1,9*

1 Dalian National Laboratory for Clean Energy, Dalian Institute of Chemical Physics, Chinese Academy of Sciences, 116023 Dalian, China;

2 School of Materials and Textile Engineering, Jiaxing University, 314001 Jiaxing, China;

3 Paul Scherrer Institut CH-5232 Villigen, Switzerland;

4 State Key Laboratory of Molecular Reaction Dynamics, Dalian Institute of Chemical Physics, Chinese Academy of Sciences, 116023, Dalian, China;

5 University of Chinese Academy of Sciences, 100049 Beijing, China;

6 Department of Chemical Physics, University of Science and Technology of China, Hefei 230026, China;

7 Department of Chemistry, Southern University of Science and Technology, Shenzhen 518055, China

8 Shanghai Synchrotron Radiation Facility, Shanghai Institute of Applied Physics, and Shanghai Advanced Research Institute, Chinese Academy of Sciences, 201204 Shanghai, China;

9 State Key Laboratory of Catalysis, Dalian Institute of Chemical Physics, Chinese Academy of Sciences, Dalian, China.

#These authors contributed equally: Siquan Feng, Jiali Mu, Xiangsong Lin.

* Corresponding authors:

Xiangen Song (xiangensong@dicp.ac.cn); Wenrui Dong ([wrdong@dicp.ac.cn](mailto:wrdong@dicp.ac.cn));

Yunjie Ding ([dyj@dicp.ac.cn](mailto:dyj@dicp.ac.cn));

**Table of Contents**

**Supplementary Figures**

1. Effect of H2S on the catalytic performance and status of Rh NPs catalysts (Rh/CMK-3 and Rh/AC) for methanol carbonylation 3

2. Effect of H2S on the catalytic performance of single-site Rh1 catalysts (Rh1/AC) for methanol carbonylatio 4

3.Molecular configuration identification of single-site Rh1/AC catalyst 5

4.HR-TEM and HAADF-STEM images of spent Rh1/AC in normal feed and S-feed 6

5.In-situ EXAFS data fitting in k3[χ(k)] for spent Rh1/AC catalyst in normal feed and S-feed 7

6. Ex-situ EXAFS data fitting in k3[χ(k)] for spent Rh1/AC catalyst in normal feed and S-feed 8

7. Rh 3d and S 2p XPS spectra of Rh1/AC and Rh/CMK-3 catalysts 9

8. FT-IR of the scrubbing solution of spent Rh1/AC in S-feed or normal feed 10

9.The laser desorption ionization time of flight mass spectrum (LDI-TOF MS) for spent Rh1/AC in normal feed and S-feed 11

10.HR-TEM image and EDS-mapping of fresh Rh/CMK-3 catalyst 12

11. HAADF-STEM image and EDS mapping of spent Rh/CMK-3 in normal feed 13

12.HAADF-STEM image and EDS mapping of spent Rh/CMK-3 in S-feed 14

13. In-situ FEL/TOF MS with different wavelengths for Rh1/AC catalyst in S-feed 15

14. In-situ DRIFT of Rh1/AC for heterogeneous methanol carbonylation in normal feed and S-feed 16

15. In-situ EPR/ESR of Rh1/AC catalyst for methanol carbonylation in normal feed and S-feed 17

16. DFT minimum energy of the molecular structures of Rh mononuclear complex 18

17. DFT calculation of I--CH3 bond length for CH3I adsorption 19

18. DFT calculation of transition state energy barrier for CH3I oxidative addition 20

**Supplementary Tables**

1. Effect of H2S on the catalytic activity of supported Rh nanoparticles (Rh/AC) and single-site Rh (Rh1/AC) catalyst 21

2. EX-situ EXAFS quantitative analysis of spent Rh1/AC in normal feed and S-feed 22

3. XPS results of Rh/CMK-3 and Rh1/AC 23

**Extended Data Figure 1** ǀ **Effect of H2S on the catalytic performance andstatus of Rh NPs catalysts (Rh/AC) for methanol carbonylation.** (**a**) effect of H2S on the catalytic activity of Rh NP (Rh/AC) for methanol carbonylation, **(b)** HR-TEM image of Rh NPs (Rh/AC), **(c)** HR-TEM image of spent Rh/AC after methanol carbonylation in normal feed, (**d**) HR-TEM image of spent Rh/AC after methanol carbonylation in S-feed, (**e**) HAADF-STEM image of spent Rh/AC after methanol carbonylation in normal feed, (**f**) HAADF-STEM image of spent Rh/AC after methanol carbonylation in S-feed, (**g**) and (**h**) are XPS fit and fitting result of spent Rh/AC after methanol carbonylation in normal feed and S-feed .

Conditions: (**a**) Cat: 0.3 g, 0.5 ml, 513 K, 1.7 MPa, CO/CH3OH = 1.0 (mole ratio), CO/H2 = 10 (mole ratio), CH3I/CH3OH =3/7 (mass ratio), H2S content = 1000 ppm, LHSV = 12 h-1.

**

**

**Extended Data Figure 2 ǀ** **Effect of H2S on the catalytic performance of single-site Rh1 catalysts (Rh1/AC) for methanol carbonylation.**

Conditions: 1wt.% Rh1/AC catalyst, Cat: 0.3 g, 513 K, 1.7 MPa, CO/CH3OH = 1.0 (mole ratio), CO/H2 = 10 (mole ratio), CH3I/CH3OH = 3/7 (mass ratio), H2S content = 1000 ppm, LHSV = 12 h-1.

**Extended Data Figure 3 ǀ Molecular configuration identification of single-site Rh1/AC catalyst.**

**(a)** HR-TEM image of single-site Rh1/AC, **(b)** HAADF-STEM image of single-site Rh1/AC, and (**c)** Rh EAXFS k-edgefitting in *R* space of fresh Rh1/AC catalyst, (**d)** quantitative analyses of Rh-CO, Rh-(O=AC), Rh-I bond contributions in the first shell of single-site Rh1/AC catalyst as measured by EXAFS path fitting in Extended Data Figure 1c, Hanning window, *R* range: 1.26–3.00 Å; *k* range: 2.49–13.0Å-1; N, coordination number; R, the distance between absorber and backscatter; σ2, Debye–Waller factor; Standard sample RhI3; amp 0.858; k-weight=1, 2, 3; E0, energy shift; Feff calculations：Single scattering, Rh-CO, reference CIF: [C4I2O4Rh2], COD 2202025, Reff=1.854 Å, Rh-I, Reff=2.661 Å；Rh-O, first quick shell path, Reff=2.1 Å. (**e**) the molecular model of single-site Rh1/AC catalyst.

**Extended Data Figure 4 ǀ HR-TEM and HAADF-STEM images of spent Rh1/AC in normal feed and S-feed. (a)** TheHR-TEM and **(b)** HAADF-STEM images of spentRh1/AC in normal feed for methanol carbonylation, respectively. **(c)** TheHR-TEM and **(d)** HAADF-STEM images of spent Rh1/AC in S-feedfor methanol carbonylation, respectively.

**Extended Data Figure 5 ǀ *In-situ* EXAFS data fitting in k2[χ(k)] for spent Rh1/AC catalyst in normal feed and S-feed.** (**a**) k2[χ(k)] fitting result in *k* space for spent Rh1/AC catalyst in normal feed. (**b**) k2[χ(k)] fitting result in *k* space for spent Rh1/AC catalyst in p S-feed.

**Extended Data Figure 6 ǀ *Ex-situ* EXAFS data fitting in k2[χ(k)] for spent Rh1/AC catalyst** **in normal feed and S-feed.** (**a**) k2[χ(k)] fitting result in *k* space for spent Rh1/AC catalyst in normal feed, (**b**) k2[χ(k)] fitting result in *k* space for spent Rh1/AC catalyst in S-feed.

**Extended Data Figure 7 ǀ Rh 3d and S 2p XPS spectra of Rh1/AC and Rh/CMK-3 catalysts. (a)** Rh 3d XPS of spent Rh1/AC in normal feed and S-feed. (**b**) Rh 3d XPS of spent Rh/CMK-3 in normal feed and S-feed. (**c**) S 2p XPS of spent Rh1/AC and Rh/CMK-3 catalysts in S-feed.

**Extended Data Figure 8 ǀ Fourier transformations infrared spectroscopy of the ethanol scrubbing solution of spent Rh1/AC in S-feed or normal feed.**

The peaks at 2052 cm-1 2004 cm-1 1966 cm-1 and 1956 cm-1 were ascribed to ν(CO) in carbonyl rhodium complex. The peaks of 420 cm-1 and 417 cm-1 on spent Rh1/AC in S-feed were probably belonged to ν(Rh-S) in Rh(CH3SH) and Rh(CH3SCH3), respectively. AC support itself contained trace of sulfur. The weaker peak of 417 cm-1 on spent Rh1/AC in normal feed belonged to the bond between Rh and sulfur in AC support.

Reference:

1. Forster, D. In Advances in organometallic chemistry, Elsevier: 1979; Vol. 17, pp 255-267.
2. El-Hendawy A. Transition metal complexes of 2-formylpyridinethiosemicarbazone (HFpyTSC) and X-ray crystal structures of [Pd (FpyTSC)(PPh3)] PF6 and [Pd (FpyTSC)(SCN)][J]. Damietta University Publication, 2014, 1(1).

**
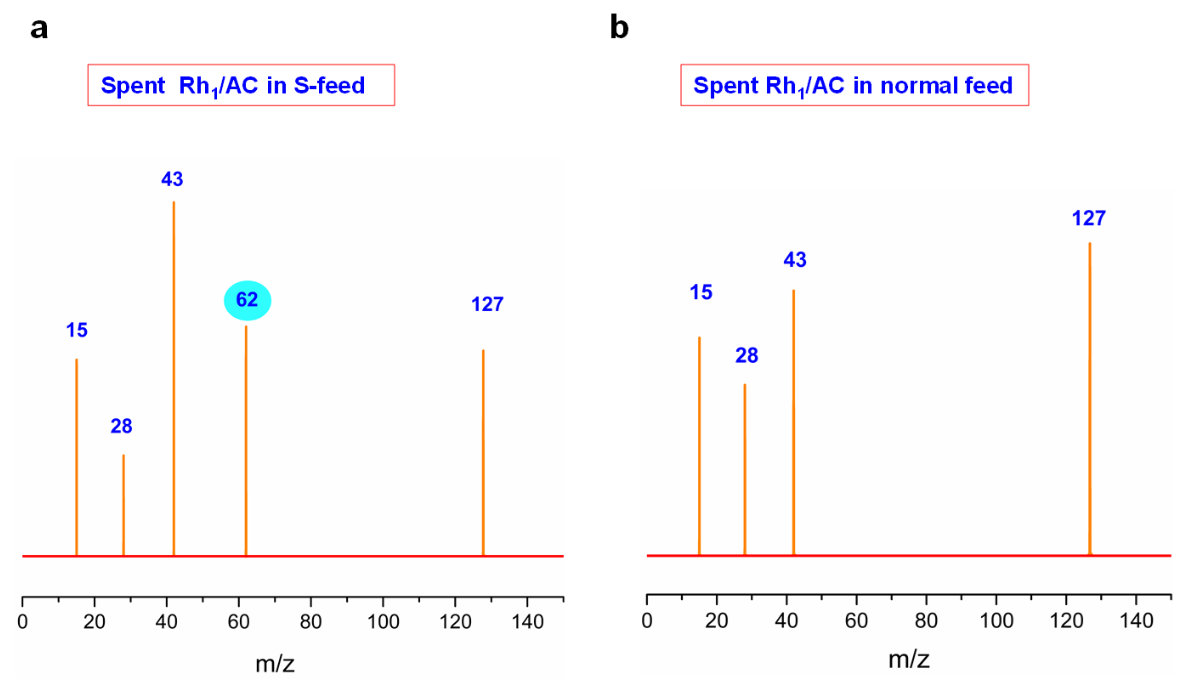
**

**Extended Data Figure 9 ǀ** **The mass spectra for spent Rh1/AC in normal feed and S-feed, obtained by laser desorption ionization time-of-flight mass spectrometry (LDI-TOF MS). (a)** Spent Rh1/AC in S-feed; **(b)** Spent Rh1/AC in normal feed. The fluence of the 266 nm desorption laser is about 35 mJ/cm2, and the fluence of the 118 nm ionization laser is about 40 uJ/cm2.

**Extended Data Figure 10 ǀ HR-TEM image and EDS-mapping of fresh Rh/CMK-3 catalyst.**

(**a**) HAADF-STEM images, (**b**) STEM-EDS line scan profile of a single NP, (**c)** EDS analysis and elemental mapping of C, Rh, O.

**Extended Data Figure 11 ǀ** **HAADF-STEM image and EDS mapping of spent Rh/CMK-3 in normal feed.** (**a**) HAADF-STEM image and corresponding NP size distribution, (**b**) STEM-EDS line scan profile of a single NP, (**c**) EDS mapping of spent Rh/CMK-3 catalyst in normal feed and the corresponding mapping of C, Rh, O, I elements.

**Extended Data Figure 12 ǀ** **HAADF-STEM image and EDS mapping of spent Rh/CMK-3 in S-feed.** (**a**) HAADF-STEM image and corresponding NP size distribution, (**b**) STEM-EDS line scan profile of a single NP, (**c**) EDS mapping of spent Rh/CMK-3 in S-feed and the corresponding mapping of C, Rh, O, I, S elements.

**Extended Data Figure 13 ǀ *In-situ* FEL/TOF MS with different wavelengths for Rh1/AC catalyst in S-feed.** Conditions: Heterogeneous methanol carbonylation on Rh1/AC catalyst at 513 K, 0.1bar with the FEL at 125, 140, 150 nm (with laser fluence of 40 uJ/cm2) to ionize the radicals and the intermediate species. (The ionization energy of (CH3)2S is 8.6 eV (144.2 nm); while the ionization energy of CH3SH is 9.4 eV (131.9 nm). By changing the wavelength of free-electron laser, we further confirmed that the species at m/z 48 and m/z 62 were CH3SH and CH3SCH3, respectively).

**Extended Data Figure 14 ǀ *In-situ* diffuse reflectance infrared Fourier transformations spectroscopy of Rh1/AC for heterogeneous methanol carbonylation in normal feed and S-feed.** *In-situ* DRFTIS methanol carbonylation experiment in (**a**) normal feed, (**b**) in S-feed, (**c**) CH3OH and CH3I (**d**) CH3OH, CH3I and H2S.





**Extended Data Figure 15 ǀ *In-situ* electron paramagnetic resonance/electron spin resonance (EPR/ESR) of Rh1/AC for methanol carbonylation in normal feed and S-feed.** Methanol carbonylation conditions: Cat: Rh1/AC 5mg, 240°C, ambient atmosphere, CO: 10 ml/min, H2: 1 ml/min, CH3OH/CH3I = 7/3 (wt%). The mixture of CH3OH/CH3I was bubbled with CO and H2. EPR/ESR test center field: 3300 G, sweep width: 6400 G, static field: 100 G, microwave bridge frequency: 9.5 GHz and the power is set as 10 mW.


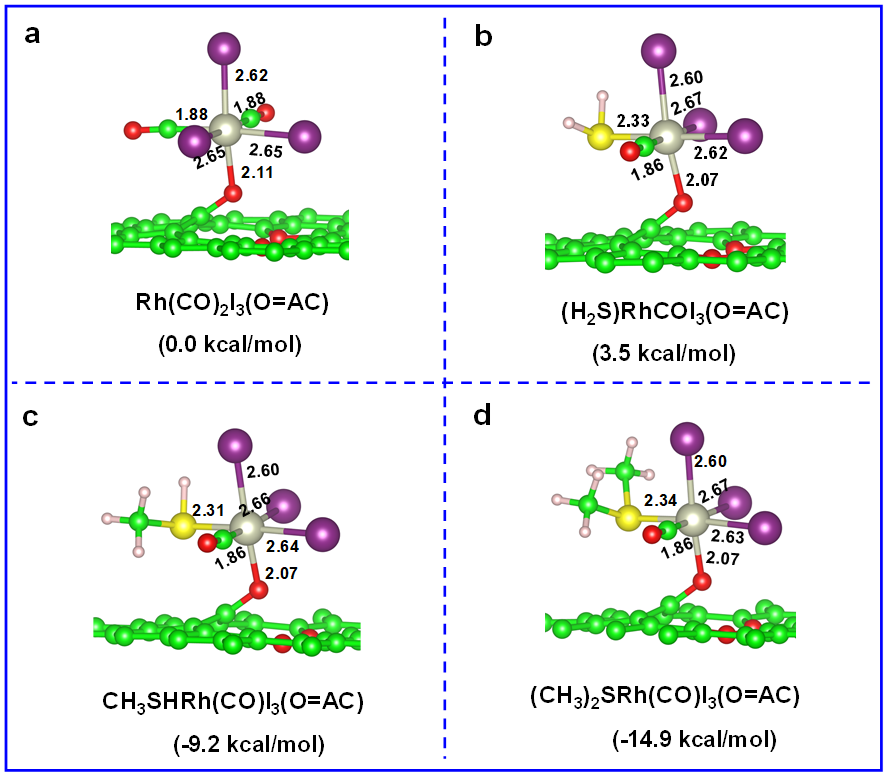


**Extended Data Figure 16 ǀ DFT minimum energy of the molecular structures of Rh mononuclear complex.** (**a**) (**b**) (**c**) (**d**) are the molecular structures of Rh(CO)2I3(O=AC), (H2S)Rh(CO)2I3(O=AC), CH3SHRh(CO)I3(O=AC), and (CH3)2SRh(CO)I3(O=AC), respectively.It could be easy to find that the (CH3SR)Rh(CO)I3(O=AC) has lower energy for CH3SH, (CH3)2S ligands, and higher energy for CH3SH ligand, when compared with Rh(CO)2I3(O=AC), suggesting that the new formed CH3SH and (CH3)2S species from H2S favored to coordinate with Rh mononuclear complex to obtain a more stable structure than Rh(CO)2I3(O=AC). Gray ball represents Rh atom; red ball represents O atom; purple ball represents I atom; yellow ball represents S atom; green ball represents C atom; pink ball represents H atom.


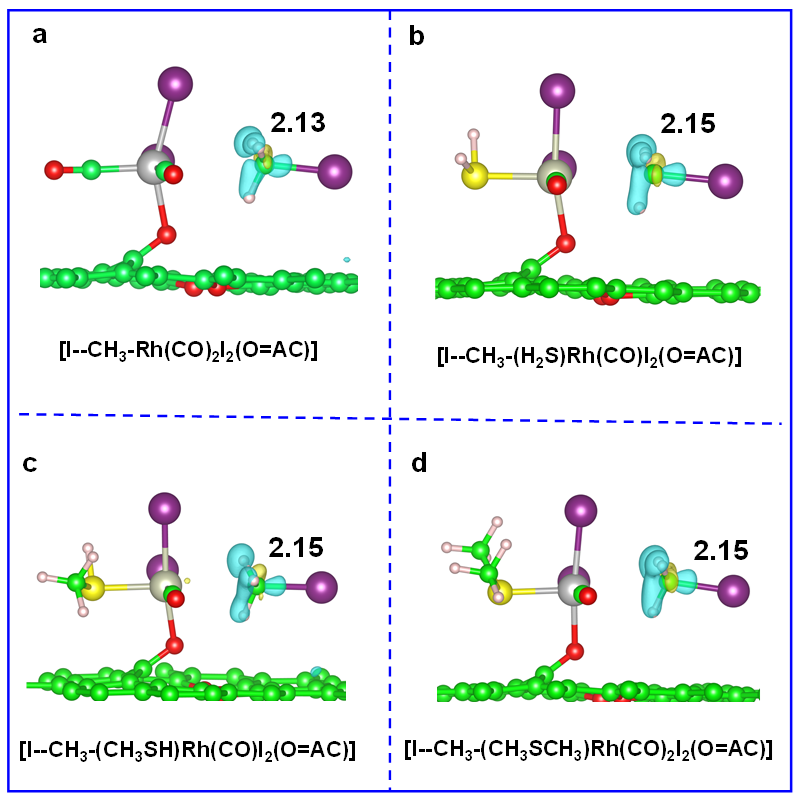


**Extended Data Figure 17 ǀ DFT calculation of I--CH3 bond length in the Rh single nuclear complex structures for CH3I adsorption.** (a) [I--CH3-Rh(CO)2I2(O=AC)]，(b) [I--CH3-(SH2)Rh(CO)I2(O=AC)], (c) [I--CH3-(CH3SH)Rh(CO)2I2(O=AC)], and (d) [I--CH3-(CH3SCH3)Rh(CO)2I2(O=AC)]. The adsorpted structures of [I--CH3-(SR)Rh(CO)I2(O=AC)] has a longer bond length of I--CH3 than [Rh(CO)2I2(O=AC)], implying that the coordination of H2S, CH3SH and (CH3)2S with [Rh(CO)I2(O=AC)] mononuclear complex could lower the adsorption energy of CH3I than CO. Gray ball represents Rh atom; red ball represents O atom; purple ball represents I atom; yellow ball represents S atom; green ball represents C atom; pink ball represents H atom.


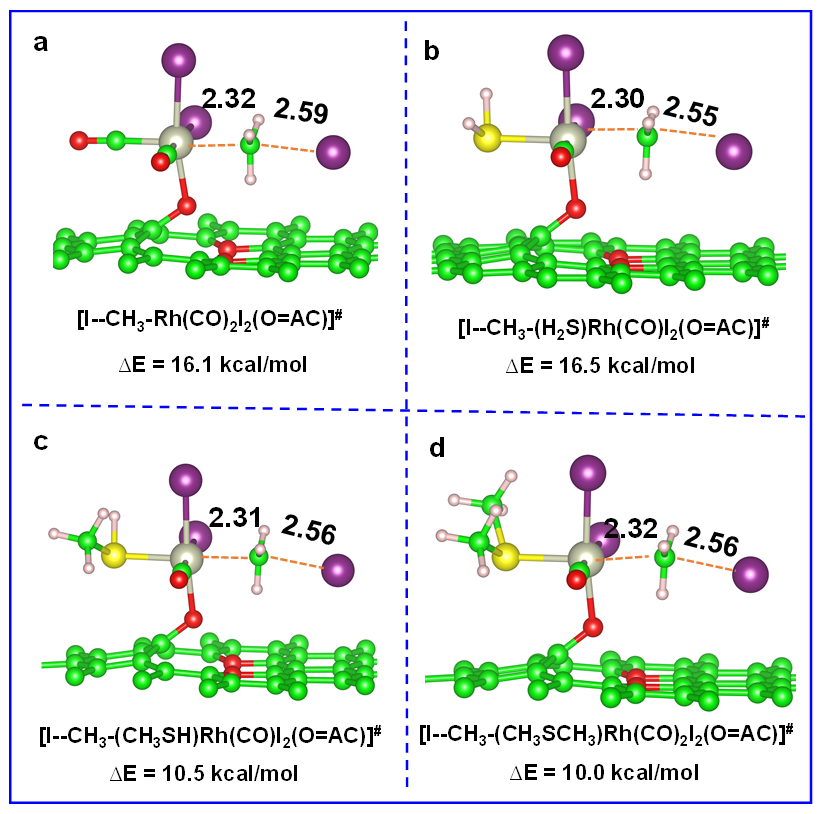


**Extended Data Figure 18 ǀ DFT transition state calculation of Rh single nuclear complexes for CH3I oxidative addtion.** (a) [I--CH3-Rh(CO)2I2(O=AC)]#, (b) [I--CH3-(H2S)Rh(CO)2I2(O=AC)]#, (c) [I--CH3-(CH3SH)Rh(CO)I2(O=AC)]#, (d) [I--CH3-(CH3SCH3)Rh(CO)I2(O=AC)]#. The transition structure of [I--CH3-(SR)Rh(CO)I2(O=AC)] with H2S coordination has a higher energy barrier of CH3I oxidative addtion than that of CO, while those with CH3SH or (CH3)2S ligands have a lower energy barrier of CH3I oxidative addtion than that of CO, implying that the coordination of CH3SH or (CH3)2S are beneficial to lower the energy barrier of CH3I oxidative addition. Gray ball represents Rh atom; red ball represents O atom; purple ball represents I atom; yellow ball represents S atom; green ball represents C atom; pink ball represents H atom.

**Extended Data Table** 1 **ǀ** Effect of H2S on the catalytic activity of supported Rh nanoparticles (Rh/AC) and single-site Rh (Rh1/AC) catalyst

| Catalysts | Conditions | Yield of products (%) | moleacetyl/moleRh/h |
| --- | --- | --- | --- |
|  | | | |
| Rh/AC | Normal feed*a* | 6.5 | 64.9 |
| **S-feed*a*** | **0.3 ↓** | **3.2 ↓** |
| Rh1/AC | Normal feed*a* | 39.2 | 136.2 |
| **S-feed*a*** | **68.8 ↑** | **215.2 ↑** |
|  | | | |
| Rh/AC | Normal feed*b* | 19.6 | 15.1 |
| **S-feed*b*** | **8.8 ↓** | **6.9 ↓** |
| Rh1/AC | Normal feed*b* | 37.7 | 9.4 |
| **S-feed*b*** | **56.7 ↑** | **14.2 ↑** |

*a*Autoclave reactor, 0.22 g catalyst (Rh content = 1 wt.%), acetic acid (100 mmol), CH3I (2.77 mmol) and ultra-pure water (30 mmol), 0.2 MPa ethylene, 1.0 MPa normal CO or CO containing 1000 ppm H2S, 453 K, 1h for Rh/AC, 3h for Rh1/AC. *b*Autoclave reactor, 0.3g catalysts (Rh content = 1wt.%), acetylene (4mmol), CH3I (8mmol) and ultrapure water (500 mmol), 2.5 MPa normal CO or CO containing 1000ppm H2S, 453 K, 1.5h for Rh/AC, 5h for Rh1/AC.

**Extended Data Table 2 ǀ** *Ex-situ* EXAFS quantitative analysis of the paths of Rh-SR, Rh-CH3, Rh-(O=AC), Rh-CO and Rh-I path contributions in the first shell of single-site Rh1/AC catalyst in the normal feed and S-feed for methanol carbonylation according to **Figure 1c**.

| Samples | Shell | N | R(Å) | σ2(10-3 Å2) | ΔE 0(eV) | R-factor |
| --- | --- | --- | --- | --- | --- | --- |
| RhI3 | Rh-I | 6.0 | 2.7±0.0 | 4.2±0.2 | 0.1±0.1 | 0.003 |
| Spent Rh1/AC in normal feed | Rh-CO | 1.6±0.4 | 1.9±0.0 | 9.8 | 2.3±0.8 | 0.013 |
| Rh-(O=AC) | 1.0 | 2.1±0.0 | 3.0 | 2.3±0.8 |
| Rh-I | 2.7±0.2 | 2.7±0.2 | 3.0 | 2.3±0.8 |
| Spent Rh1/AC in S-feed | Rh-CO | 0.5±0.4 | 2.0±0.1 | 5.5 | 2.6±0.5 | 0.003 |
| Rh-(O=AC) | 1.0 | 2.1±0.1 | 3.0 | 2.6±0.5 |
| Rh-SR | 0.8±0.2 | 2.3±0.0 | 3.0 | 2.6±0.5 |
| Rh-I | 3.4±0.3 | 2.7±0.0 | 3.0±0.5 | 2.6±0.5 |

Standard Sample RhI3, *R* range: 1.3–2.9 Å; *k* range: 2.4–14.4 Å-1, k-weight=1, 2, 3. S02=0.80. Spent Rh1/AC in normal feed, S02=0.80; *R* range: 1.2–3.2 Å; *k* range: 2.5–11.7 Å-1, k-weight=1, 2, 3. Spent Rh1/AC in S-feed, R range: 1.1–3.0 Å; k range: 2.4–13.1 Å-1, k-weight =1, 2, 3.

N, coordination number; R, distance between absorber and backscatter; σ2, Debye–Waller factor; ΔE0, energy shift. Feff calculations: Single scattering, Rh-Rh, reference CIF: Rh Fm-3m COD 2100454, Reff=2.539 Å; Rh-CO, reference CIF: [C4I2O4Rh2] COD 2202025, Reff=1.854 Å; Rh-I, reference CIF: RhI3 sm_isp_SD0541773, Reff=2.661 Å; Rh-O, first quick shell path, Reff=2.1 Å, according to the result of DFT calculation; Rh-S, Reference CIF: RhCl3(SMe2)3 COD 2214350, Reff=2.335 Å.

**Extended Data Table 3 ǀ The analysis result of XPS spectra in Extended Data Figure 7**

| Samples | Spent Rh1/AC in normal feed | | | Spent Rh1/AC  in S-feed | | | Spent Rh/CMK-3 in normal feed | | | | Spent Rh/CMK-3 in S-feed | | | |
| --- | --- | --- | --- | --- | --- | --- | --- | --- | --- | --- | --- | --- | --- | --- |
| B. E. (eV) | Area % | | B. E. (eV) | Area % | | B. E. (eV) | | Area % | | B. E. (eV) | | Area % | |
| Rh0 | - | | - | - | | - | | 306.8 | | 25.4 | | 307.8 | | 51.3 | |
| Rh3+ | 309.0 | | 68.5 | 309.0 | | 63.8 | | 308.7 | | 43.8 | | 309.2 | | 24.8 | |
| Rh4+ | 311.5 | | 31.5 | 311.8 | | 36.2 | | 310.5 | | 30.8 | | 310.7 | | 23.9 | |
| CH3-S-CH3 | - | | - | 162.8 | | 56.2 | | - | | - | | 162.9 | | 34.9 | |
| CH3-SH/Rh-S | - | | - | 163.8 | | 43.8 | | - | | - | | 164.0 | | 65.1 | |
